# Supplementary material for: Intra- and Intermolecular Hydrogen Bonding in Miscible Blends of CO2/Epoxy Cyclohexene Copolymer with Poly(Vinyl Phenol)
Source: MDPI journal article supplement (doi:10.3390/ijms23137018), 2022-06-24
Supplement: s1 [file s1]

**Supporting Information for**  
**Intra- and Intermolecular Hydrogen Bonding in Miscible Blends of**  
**CO<sub>2</sub>/Epoxy Cyclohexene Copolymer with Poly(vinyl phenol)**

**Wei-Ting Du,<sup>a</sup> Yen-Ling Kuan,<sup>a</sup> and Shiao-Wei Kuo<sup>a,b\*</sup>**

<sup>a</sup>Department of Materials and Optoelectronic Science, Center of Functional Polymers and Supramolecular Materials, National Sun Yat-Sen University, Kaohsiung 80424, Taiwan

<sup>b</sup>Department of Medicinal and Applied Chemistry, Kaohsiung Medical University, Kaohsiung, 807, Taiwan.

\*Corresponding authors: E-mails: [kuosw@faculty.nsysu.edu.tw](mailto:kuosw@faculty.nsysu.edu.tw)

## Ligand LH

A solution of 2,2-dimethyl-1,3-propanediamine in moderate MeOH was added dropwise to 2 equiv. of *o*-vanillin solution. The mixture was stirred for 4 h at room temperature and then the solvent was evaporated under vacuum to obtain a yellow powder. This synthesis was performed based on the report from the Williams group.<sup>1</sup> <sup>1</sup>H NMR (500 MHz, CDCl<sub>3</sub>, δ, ppm): 1.07 (s, 6H, CCH<sub>3</sub>), 3.49 (s, 4H, NCH<sub>2</sub>), 3.91 (s, 6H, OCH<sub>3</sub>), 6.77–6.95 (m, 6H, ArH), 8.32 (s, 2H, N=CH), 14.15 (br, 2H, COH). <sup>13</sup>C NMR (125 MHz, CDCl<sub>3</sub>, δ, ppm): 24.3 (CCH<sub>3</sub>), 36.3 (C-CH<sub>3</sub>), 56.2 (OCH<sub>3</sub>), 67.5 (NCH<sub>2</sub>), 114.3–123.5 (ArC), 149.1 (COCH<sub>3</sub>), 152.8 (COH), 166.6 (N=C). FTIR (KBr, cm<sup>-1</sup>): 1632 (aromatic C=C), 3450 (O-H).

## Catalyst LZn<sub>2</sub>(OAc)<sub>2</sub>

A solution of Zn(OAc)<sub>2</sub>·2(H<sub>2</sub>O) (2 equiv.) in MeOH was added to a solution of LH and then the mixture was stirred at room temperature overnight. Evaporation of the solvent vacuo provided a yellow powder. Washing with hexane, followed by crystallization from THF/hexane, yielded LZn<sub>2</sub>(OAc)<sub>2</sub>. This synthesis was performed based on a report from the Williams group.<sup>1</sup> <sup>1</sup>H NMR (500 MHz, CDCl<sub>3</sub>, δ, ppm): 1.03 (s, 6H, CCH<sub>3</sub>), 1.97 [s, C(O)CH<sub>3</sub>, 6H], 3.74 (s, 4H, NCH<sub>2</sub>), 3.86 (s, 6H, OCH<sub>3</sub>), 6.50–6.90 (m, 6H, ArH), 8.04 (s, 2H, N=CH). <sup>13</sup>C NMR (125 MHz, CDCl<sub>3</sub>, δ, ppm): 23.3 [C(O)CH<sub>3</sub>], 25.4 (C-CH<sub>3</sub>), 35.5 (CCH<sub>3</sub>), 56.0 (OCH<sub>3</sub>), 75.0 (NCH<sub>2</sub>), 114.2–118.6 (ArC), 127 (COCH<sub>3</sub>), 150.9 (C-OH), 171.1 (N=C). FTIR (KBr, cm<sup>-1</sup>): 1624 (aromatic C=C).

## Characterization

<sup>1</sup>H and <sup>13</sup>C NMR spectra were recorded using an INOVA 500 MHz NMR spectrometer, with CDCl<sub>3</sub> as an external standard. Weight average (*M<sub>w</sub>*) and number average (*M<sub>n</sub>*) molecular weights and polydispersity indexes (*M<sub>w</sub>*/*M<sub>n</sub>*) were determined using a Water 510 gel permeation chromatograph. IR spectra were recorded using a Bruker Tensor 27 FTIR spectrophotometer and the conventional

crystal KBr disk method; 32 scans were collected at a spectral resolution of  $4\text{ cm}^{-1}$ ; a temperature-controlled compartment holder was used to record FTIR spectra at various temperatures, to maintain dry sample films. Glass transition temperatures were measured using a TA Q-20 differential scanning calorimeter; approximately 5 mg of sample was placed on a DSC sample pan and heated from 40 to  $180\text{ }^{\circ}\text{C}$  at a heating rate of  $10\text{ }^{\circ}\text{C min}^{-1}$  under a  $\text{N}_2$  atmosphere ( $50\text{ mL min}^{-1}$ ). High-resolution solid state  $^{13}\text{C}$  NMR spectroscopy was performed at  $25\text{ }^{\circ}\text{C}$  using a Bruker AVANCE III spectrometer operated at a resonance frequency of  $100.62\text{ MHz}$ . The experiments were performed using the cross-polarization (CP)/magic-angle spinning (MAS)/high-power dipolar decoupling (DD) technique. The proton spin-lattice relaxation time in the rotating frame ( $T_{1\rho}\text{H}$ ) was determined through carbon observation using a  $90^{\circ}$   $\tau$ -spin lock pulse sequence prior to CP. The acquisition was performed at delay times (s) ranging from 0.1 to 30 ms with a contact time of 1.0 ms.

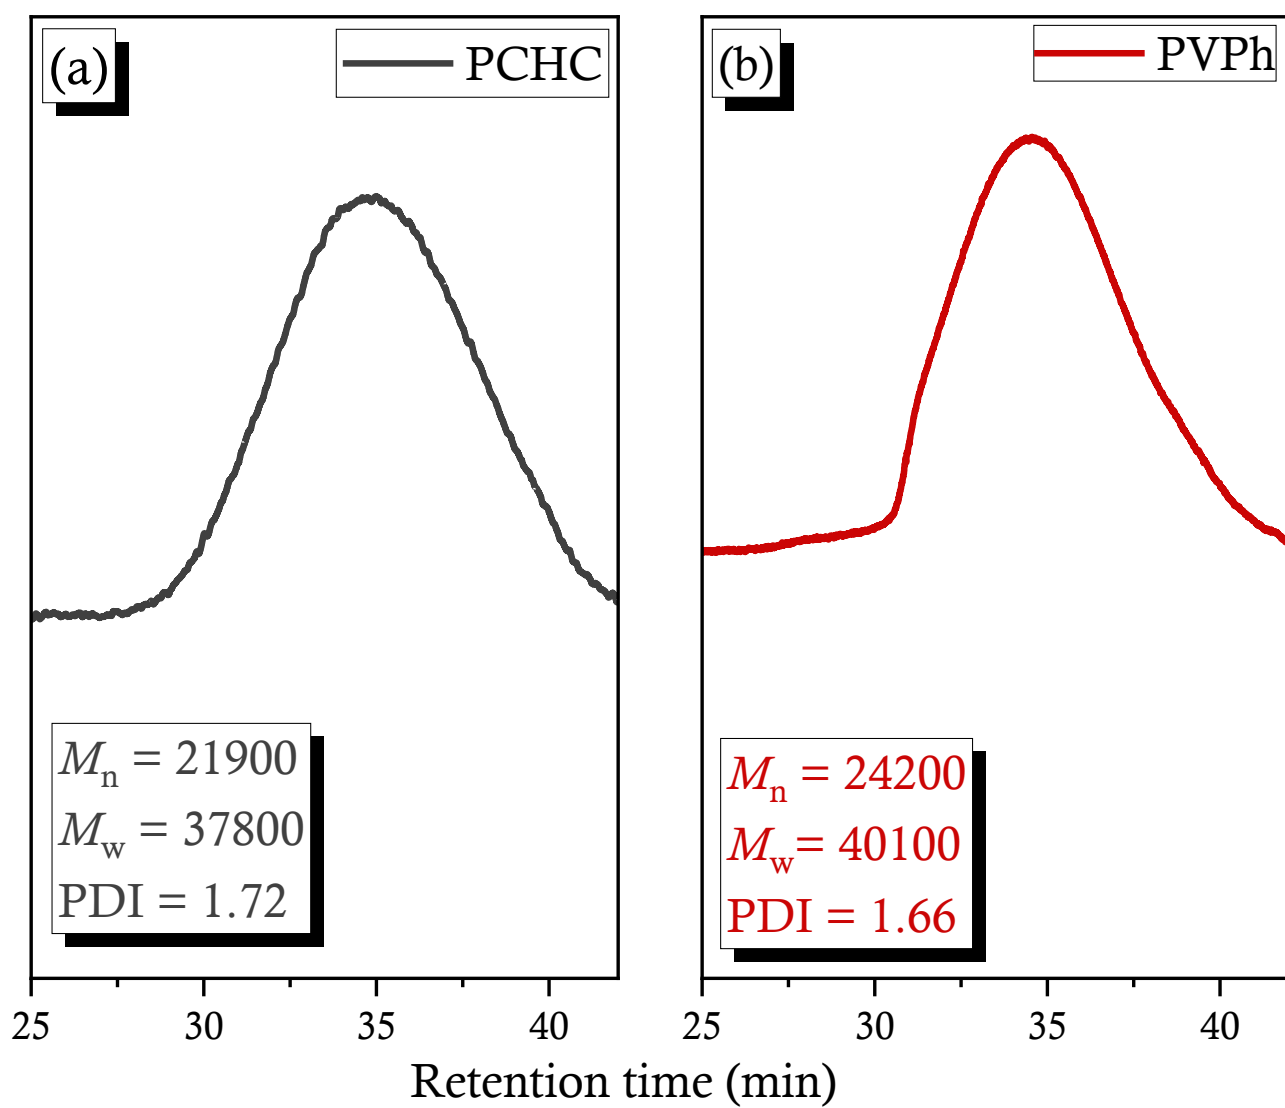

**Figure S1:** GPC analyses of (a) pure PCHC copolymer and (b) PVPh homopolymer

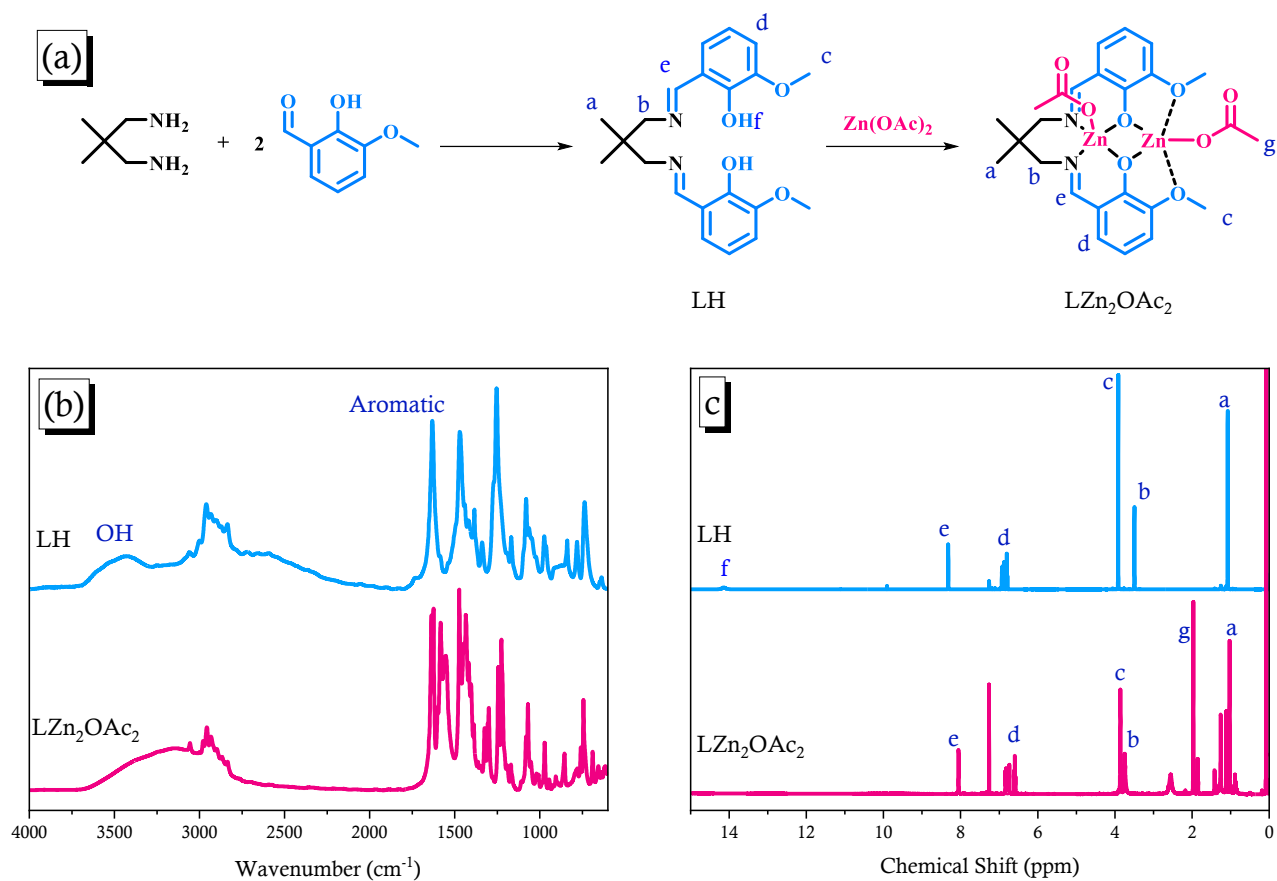

**Figure S2:** (a) The synthesis of LH and LZn<sub>2</sub>OAc<sub>2</sub>, (b) its related corresponding FTIR spectra and (c) <sup>1</sup>H NMR spectra

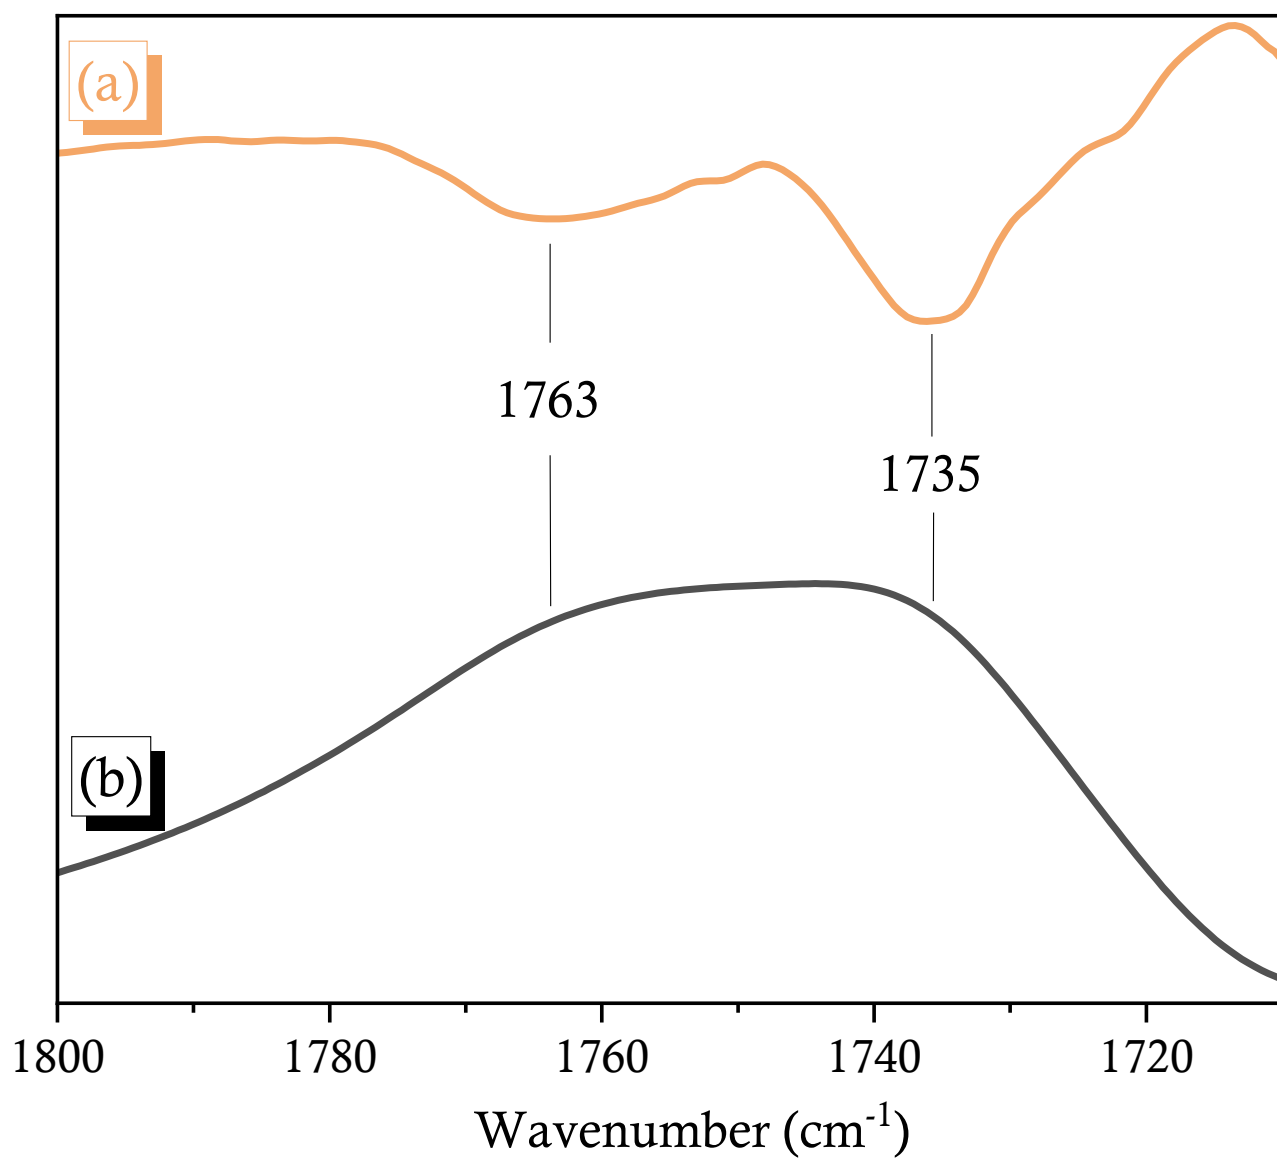

**Figure S3:** FTIR spectrum of C=O absorption and its second derivative spectrum of PCHC copolymer at 120 °C

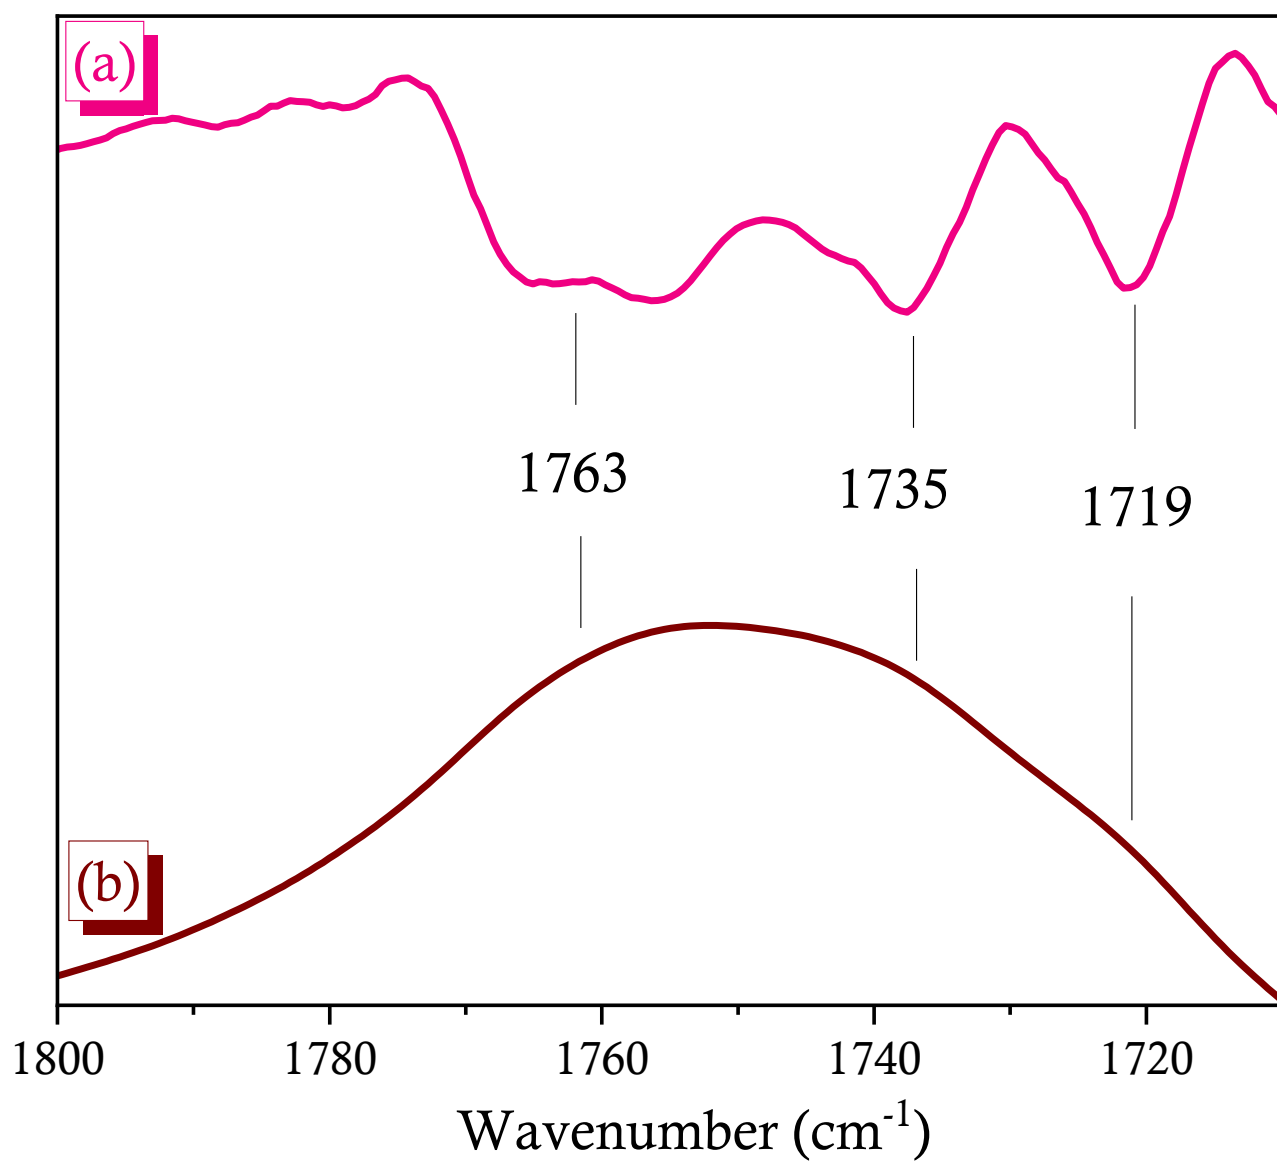

**Figure S4:** The IR spectrum of C=O absorption and its second derivative spectrum of PCHC-50 blend at 120 °C

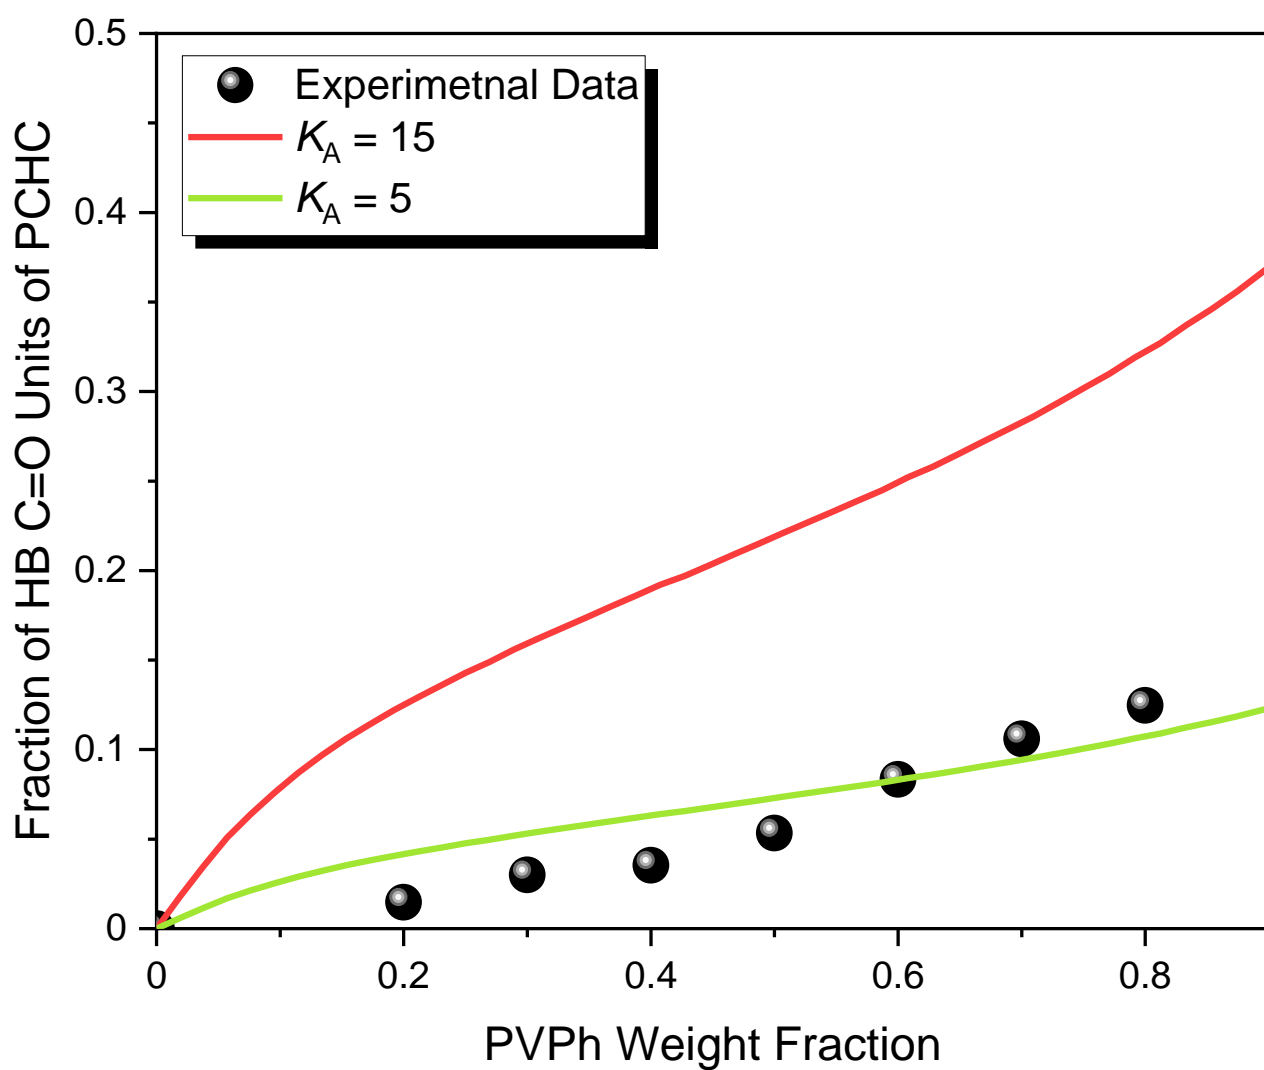

**Figure S5:** Experimental data about fraction of H-bonded C=O units of PCHC and predicted by PCAM



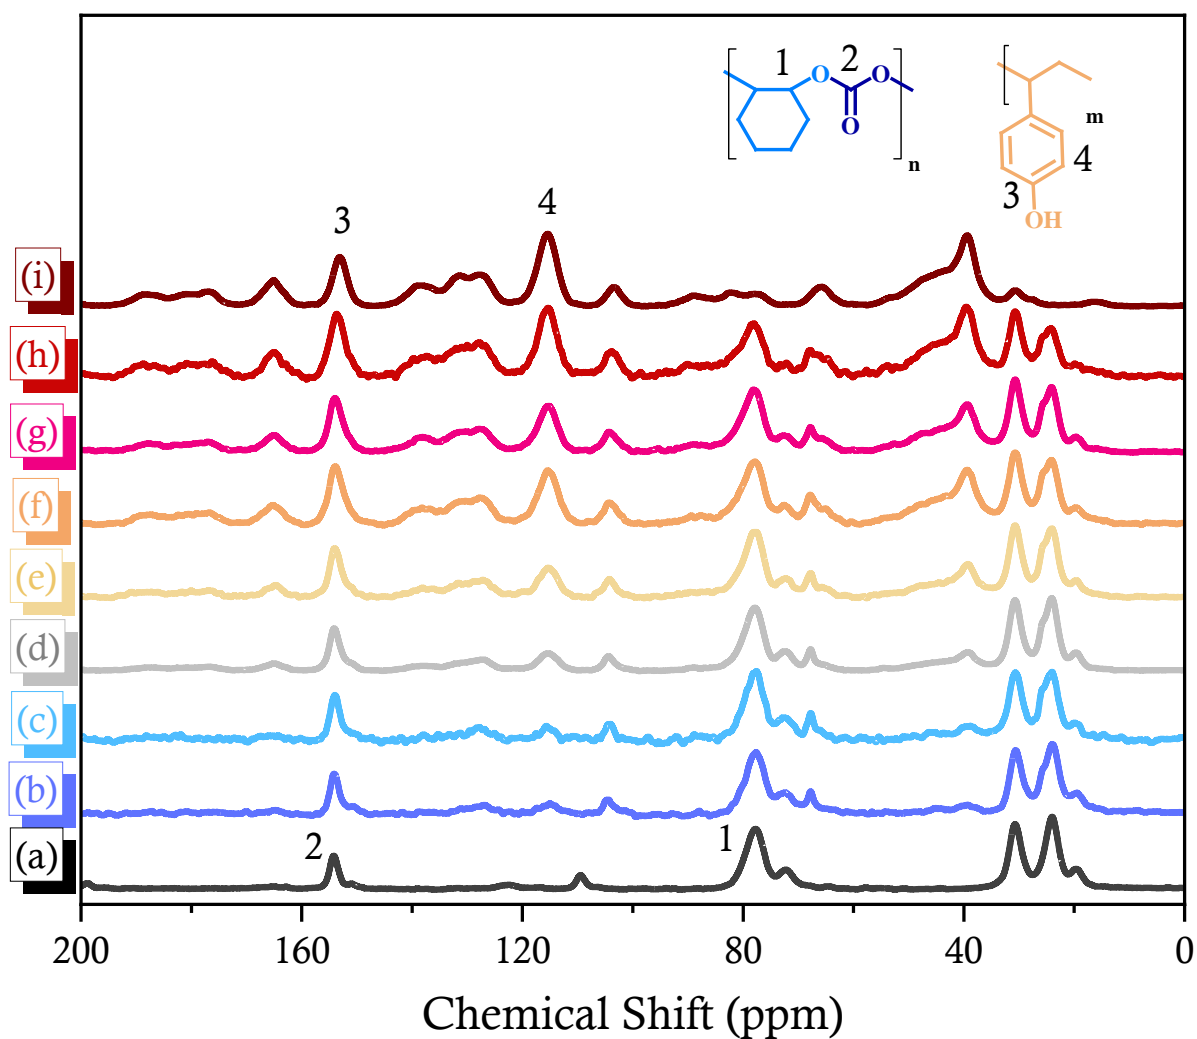

**Figure S6:** High-resolution solid-state  $^{13}\text{C}$  NMR spectroscopy experiment was performed at 25 °C: (a) PCHC, (b) PCHC-80 (c) PCHC-70, (d) PCHC-60, (e) PCHC-50, (f) PCHC-40, (g) PCHC-30, (h) PCHC-20, (i) PVPh

## References

1. Thevenon, A.; Garden, J. A.; White, A. J. P.; Williams, C. K. Dinuclear Zinc Salen Catalysts for the Ring Opening Copolymerization of Epoxides and Carbon Dioxide or Anhydrides. *Inorg. Chem.* **2015**, *54*, 11906–11915.
